# Supplementary material for: Oxygen-vacancy V2O5 ultrathin nanosheets adorned with PEDOT films as anodes for high-energy-density asymmetric supercapacitors
Source: Royal Society of Chemistry journal article supplement (doi:10.1039/d3nj03429a), 2023-01-01
Supplement: d3nj03429a1.pdf [file d3nj03429a1.pdf]

## Supplementary material

### Oxygen-Vacancy V<sub>2</sub>O<sub>5</sub> Ultrathin Nanosheets Adorned with PEDOT Film as Anode for High-Energy-Density Asymmetric Supercapacitors

Yanmei Liang <sup>a,#</sup>, Danqin Li <sup>a,#</sup>, Yao He <sup>a</sup>, Shixing Chao <sup>a</sup>, Mingming Zhang <sup>a</sup>,  
Xueqian Zhao <sup>a</sup>, Weiqiang Zhou <sup>a,\*</sup>, Jingkun Xu <sup>a,\*</sup>, Baoyang Lu <sup>a</sup>

<sup>a</sup> Flexible Electronics Innovation Institute (FEII), Jiangxi Science and Technology  
Normal University, Nanchang 330013, PR China

\*Corresponding author: E-mail: zhouwqh@163.com; xujingkun@tsinghua.org.cn

# Yanmei Liang and Danqin Li, These authors contributed equally to this work.

For the three-electrode system, the specific capacitance ( $C_{S1}$ ) of the sample was calculated from GCD curves according to the following formula:

$$C_{S1} = \frac{I * \Delta t}{m * \Delta V}$$

where " $C_{S1}$ " is the specific capacitance ( $F g^{-1}$ ), " $I$ " is the charge/discharge current (A), and " $\Delta t$ " is the discharge time (s), " $\Delta V$ " is the voltage window (V), and " $m$ " is the mass loading (g) of the active material.

For the two-electrode system, the specific capacitance ( $C_{S2}$ ) was calculated by the

following formula:

$$C_{S2} = \frac{I * \Delta t}{m * \Delta V}$$

The  $I$ ,  $\Delta V$ ,  $\Delta t$ , and  $m$  are the discharge current, the voltage window, the discharge time (s), and the mass loading of the active material of the work electrodes, respectively.

The energy density (E) and power density (P) can be calculated by the following two equations:

$$E = \frac{1}{2} * \frac{1}{3.6} * C_{S2} * \Delta v^2$$

$$P = \frac{3600 * E}{\Delta t}$$

The  $C_{S2}$ ,  $\Delta t$ , and  $\Delta V$  are specific capacitances, discharge time, and voltage window.

To obtain the maximum cell energy of the prototype supercapacitors, the cathode (represented by "ca") and anode (represented by "an") mass ratio was optimized according to the following formula:

$$\frac{m_{ca}}{m_{an}} = \frac{C_{an} * \Delta U}{C_{ca} * \Delta U}$$

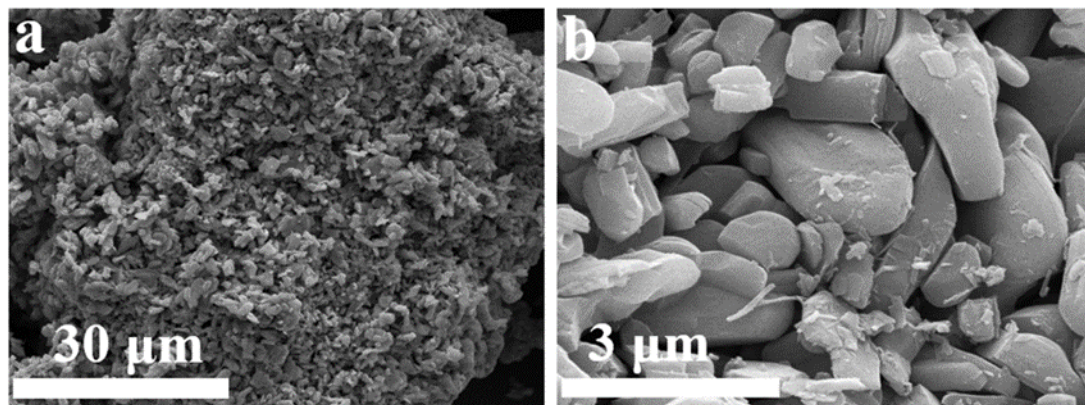

Fig. S1. SEM of bulk V<sub>2</sub>O<sub>5</sub>.

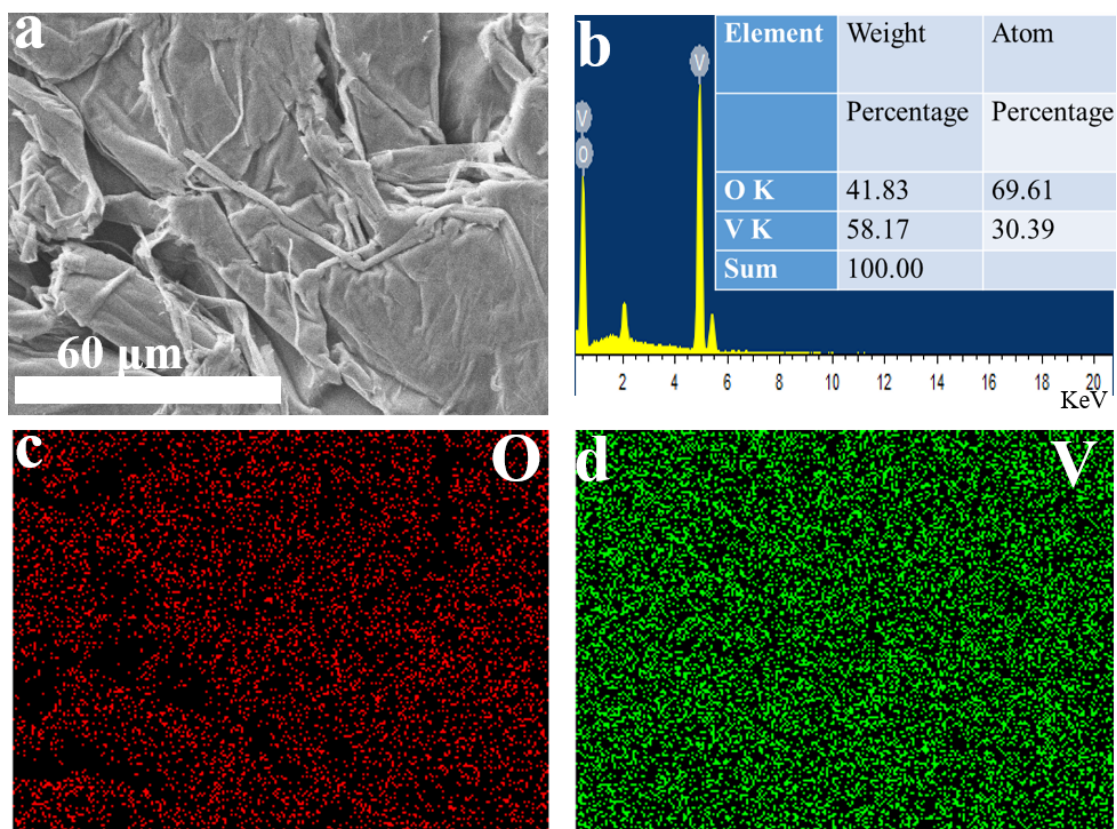

Fig. S2. SEM (a), EDS (b) and elements mapping of V<sub>2</sub>O<sub>5</sub>.

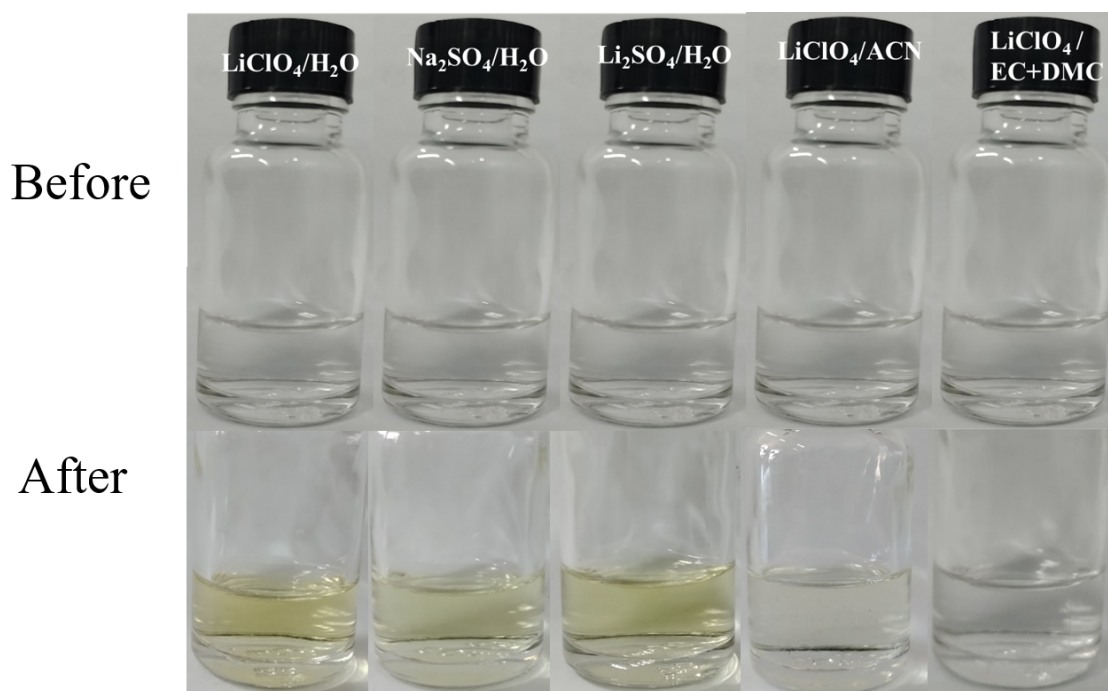

**Fig. S3.** The digital camera diagram of  $V_2O_5$  before and after electrochemical measure in different electrolytes.

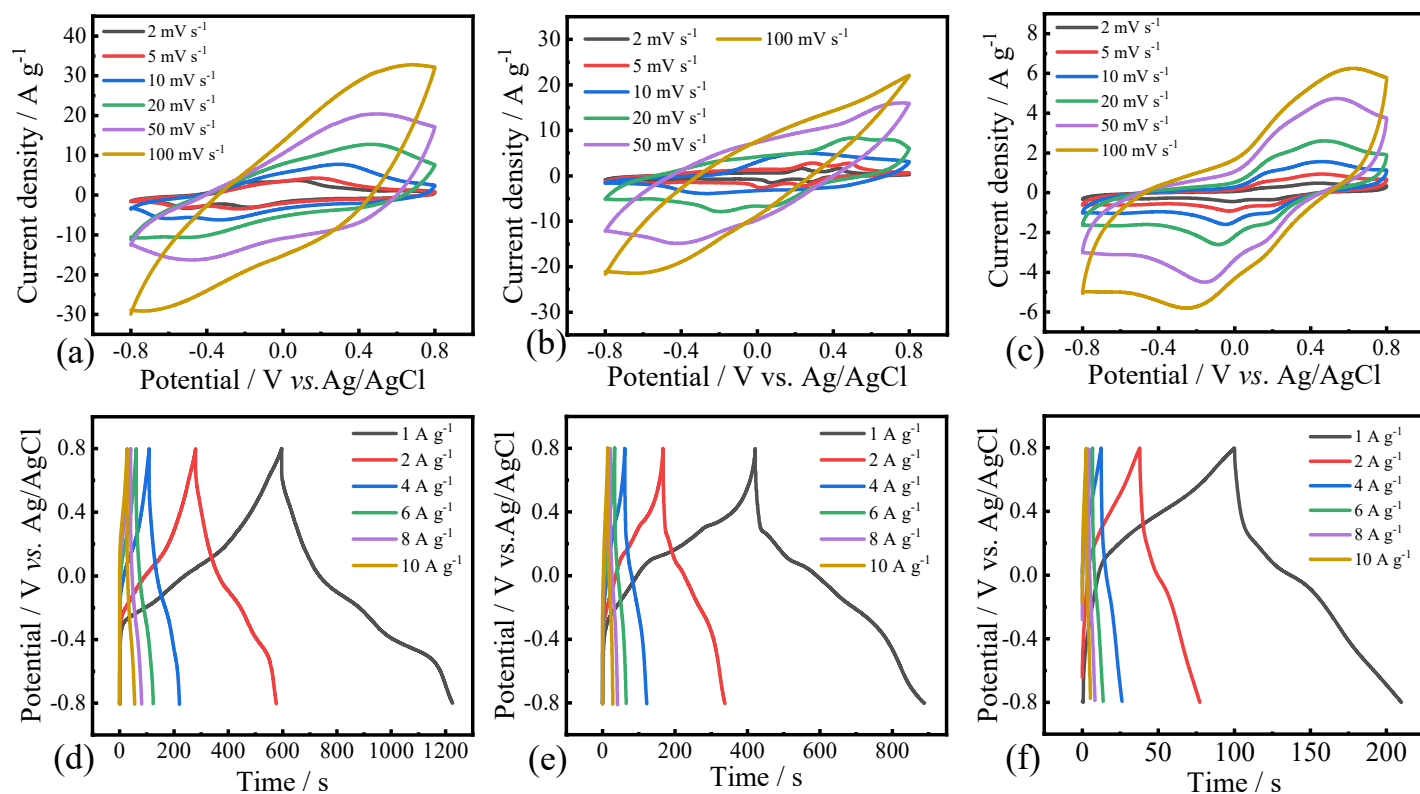

**Fig. S4.** CV curves (a-c) at different scan rates and GCD curves (d-f) at different current density of PEDOT/ $V_2O_5$  aerogel,  $V_2O_5$  aerogel, bulk  $V_2O_5$ , respectively.

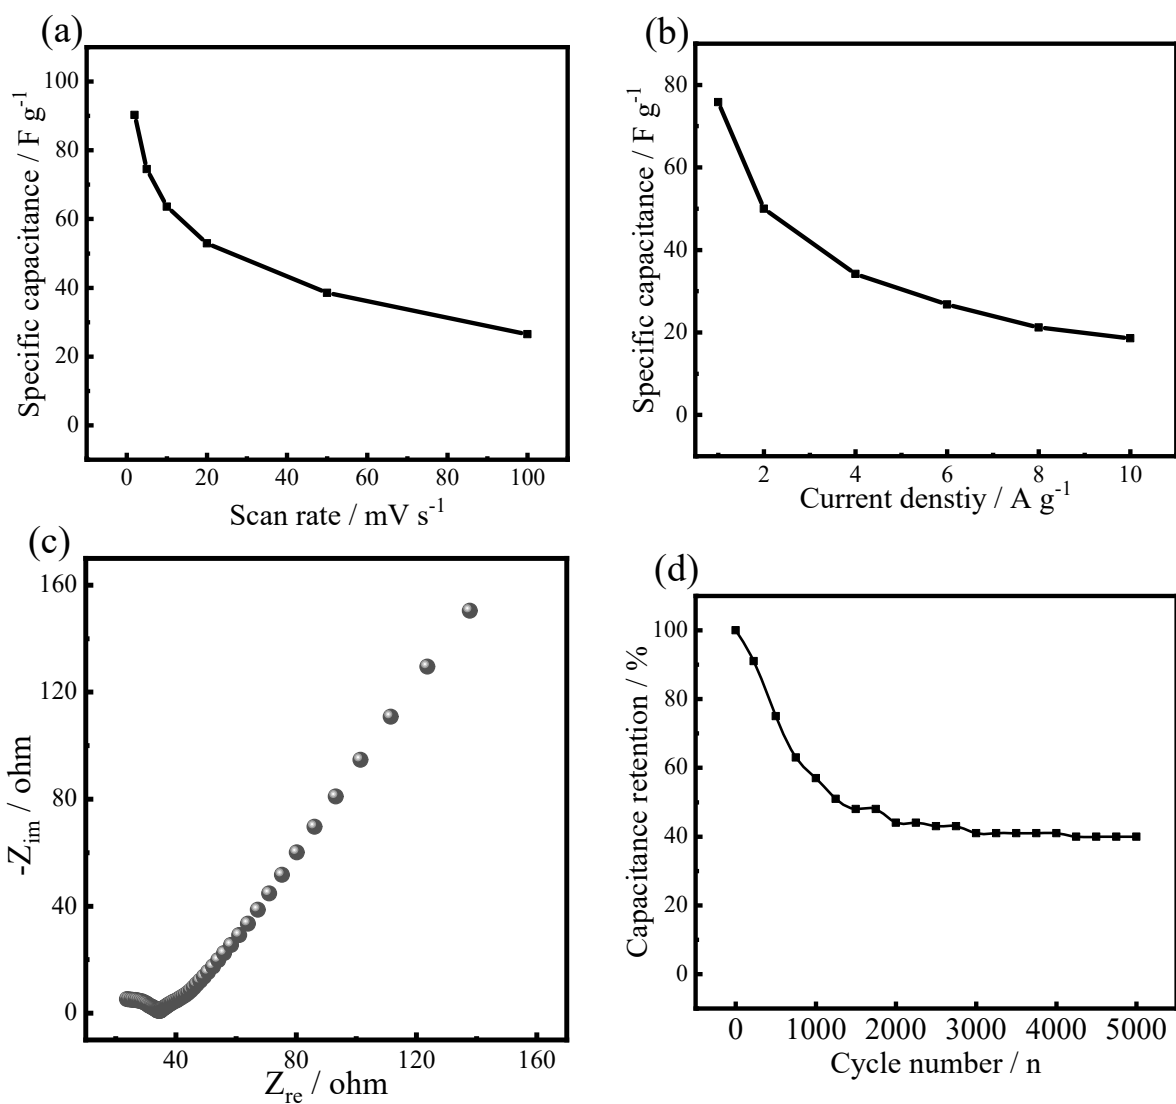

**Fig. S5.** The electrochemical measurements of bulk  $V_2O_5$  in 1 M  $LiClO_4/EC+DMC$ : specific capacitance at different scan rate (a) and current density (b), EIS plots (c) and cycling ability at 20  $A\ g^{-1}$  (d).

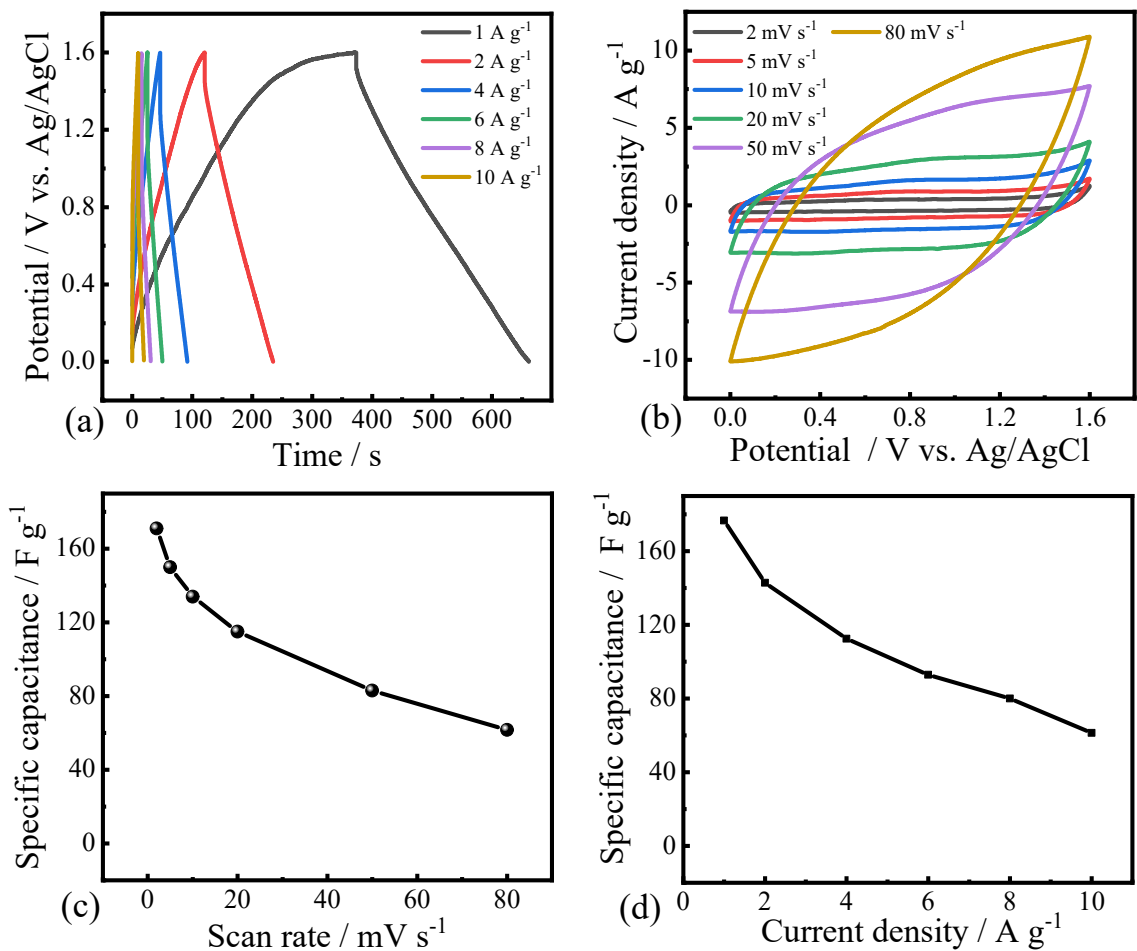

**Fig. S6.** The electrochemical measurements of active carbon in 1 M LiClO<sub>4</sub>/EC+DMC: (a) the curves of CV at different scan rate, (c) the curves of GCD at various current densities, specific capacitance at different scan rate (c) and current density (d).
